# Supplementary material for: Disease progression in women with X-linked adrenoleukodystrophy is slow
Source: Orphanet J Rare Dis. 2019 Feb 7;14:30. doi: 10.1186/s13023-019-1008-6 (PMC6367840; doi:10.1186/s13023-019-1008-6)
Supplement: Supplementary file 1 — Individual clinical data: mutations, symptoms and signs. The presence of symptoms or signs is categorized in 1 ‘Yes’ and 0 ‘No’. The duration of neurological symptoms is categorized in 0 ‘ No myelopathy ’, 1 ‘ Neurological symptoms for ≤ 10 years ’ and 2 ‘ Neurological symptoms for > 10 years ’. (XLS 50 kb) [file 13023_2019_1008_MOESM1_ESM.xls]

## Sheet: Blad1
Additional file 1. Individual clinical data: mutations, symptoms and signs.
Subject	Assessments	Mutation DNA level	Mutation protein level	Age 1	Age 2	Urine incontinence 1	Urine incontinence 2	Fecal incontiennce 1	Fecal incontinence 2	Gait disorder 1	Gait disorder 2	Sensory complaints 1	Sensory complaints 2	Sensory disturbance 1	Sensory disturbance 2	Spasticity 1	Spasticity 2	Weakness 1	Weakness 2	Pathological reflexes 1	Pathological reflexes 2	Symptomatic 1	Symptomatic 2	Duration of symptoms
1	2	c.901-5C>A	p.Val301fs*?	56	65	1	1	1	1	0	1	0	1	0	1	0	1	0	1	1	1	1	1	2
2	2	c.901-5C>A	p.Val301fs*?	44	53	0	1	0	1	1	1	0	1	0	1	0	0	0	1	1	1	1	1	2
3	2	c.659T>C	p.Leu220Pro	42	50	1	1	1	1	1	1	0	0	1	1	1	0	1	0	1	1	1	1	1
4	2	c.397C>T	p.Gln133*	44	53	0	1	0	0	0	0	0	0	0	1	0	0	0	0	0	0	0	1	0
5	1	c.1961T>C	p.Leu654Pro	38		1		1		1		1		1		1		1		1		1		2
6	2	c.220C>T	p.Arg74Trp	60	69	0	1	0	0	1	1	0	1	1	1	1	1	1	1	1	1	1	1	2
7	2	c.1A>G	p.Met1Val	35	44	0	0	0	0	0	0	0	0	0	0	0	0	0	0	0	1	0	0	0
8	2	c.734C>A	p.Ala245Asp	42	50	0	1	1	1	0	0	0	0	0	0	0	0	0	0	0	0	0	0	0
9	2	c.659T>C	p.Leu220Pro	44	53	0	0	0	0	0	1	0	0	0	1	0	0	0	0	0	0	0	1	0
10	2	c.1961T>C	p.Leu654Pro	57	65	1	0	0	0	1	1	1	1	1	1	0	0	0	1	1	1	1	1	2
11	2	exon8-10del		61	70	1	1	1	1	1	1	1	1	1	1	0	0	0	1	1	1	1	1	2
12	1	c.1825G>A	p.Glu609Lys	71		0		0		0		0		1		0		0		1		0		0
13	2	c.268G>T	p.Glu90*	42	50	0	1	0	1	0	0	0	1	1	0	0	0	0	0	1	1	0	1	0
14	2	c.1628C>T	p.Pro543Leu	48	57	1	1	0	1	0	1	0	1	1	1	0	1	0	1	1	1	1	1	1
15	2	c.1628C>T	p.Pro543Leu	60	69	1	1	0	0	0	0	0	0	1	1	0	0	0	0	1	1	1	1	2
16	2	c.1628C>T	p.Pro543Leu	31	41	0	0	0	0	0	0	0	0	0	1	0	0	0	0	0	1	0	0	0
17	1	c.1970delTCA	p.Ile657del	51		1		0		1		0		1		1		1		1		1		2
18	2	c.446G>A	p.Ser149Asn	40	48	0	1	0	1	0	0	0	0	0	1	0	0	0	1	0	1	0	1	0
19	2	c.1166G>A	p.Arg389His	29	37	0	1	0	0	0	1	0	1	0	1	0	0	0	1	0	1	0	1	0
20	2	c.1166G>A	p.Arg389His	57	65	1	1	1	1	1	1	1	1	1	1	0	0	0	1	0	0	1	1	2
21	1	c.220C>T	p.Arg74Trp	37		0		0		0		0		0		0		0		0		0		0
22	1	c.220C>T	p.Arg74Trp	31		0		0		0		0		0		0		0		0		0		0
23	2	c.1825G>A	p.Glu609Lys	40	50	1	1	1	1	1	1	1	1	1	1	0	1	0	1	1	1	1	1	2
24	1	c.643delC	p.Leu215*	59		1		1		1		1		1		1		1		1		1		2
25	2	c.659T>C	p.Leu220Pro	59	67	0	0	0	0	0	0	1	1	1	1	0	0	1	0	0	0	1	1	1
26	2	c.621_900+384del664	p.Val208Trpfs*35	39	48	0	1	1	1	1	0	0	1	1	1	0	0	0	0	0	0	1	1	1
27	2	c.659T>C	p.Leu220Pro	51	59	0	1	0	0	0	1	1	1	1	1	0	0	0	1	0	1	1	1	1
28	1	c.901-5C>A	p.Val301fs*?	28		0		0		0		0		0		0		0		0		0		0
29	2	c.847C>T	p.His283Tyr	35	43	0	1	0	1	0	0	0	0	0	1	0	0	0	0	0	1	0	1	0
30	2	c.1628C>T	p.Pro543Leu	57	65	0	1	0	0	1	1	1	1	1	1	0	0	1	1	1	1	1	1	2
31	2	c.529C>T	p.Gln177*	51	58	1	1	1	1	1	1	0	1	1	1	0	0	1	1	1	1	1	1	2
32	2	c.1390C>T	p.Arg464*	47	54	1	1	1	1	0	0	0	0	1	1	0	0	0	0	0	1	1	1	1
33	2	c.1322insA	p.Asp442Glyfs*114	56	63	1	1	0	0	1	1	0	1	1	1	0	0	1	1	1	1	1	1	1
34	2	c.1846G>A	p.Ala616Thr	45	53	1	1	1	1	1	0	1	1	1	1	0	0	0	1	1	1	1	1	2
35	2	c.1846G>A	p.Ala616Thr	65	73	0	1	1	1	0	0	0	1	0	0	0	0	0	0	0	0	0	0	0
36	1	c.337delC	p.Arg113Alafs*85	47		1		0		1		0		0		0		0		1		1		1
37	2	c.1166G>A	p.Arg389His	45	53	1	1	0	1	0	0	1	1	0	1	0	0	0	0	0	0	0	1	0
38	1	c.847C>T	p.His283Tyr	76		1		0		1		0		1		0		0		1		1		1
39	1	c.446G>A	p.Ser149Asn	22		0		0		0		0		0		0		0		0		0		0
40	2	c.1826A>G	p.Glu609Gly	24	31	0	0	0	0	0	0	0	1	0	0	0	0	0	0	0	0	0	0	0
41	2	c.659T>C	p.Leu220Pro	44	51	0	0	0	0	0	0	0	0	0	1	0	0	0	0	0	0	0	0	0
42	2	c.1899delC	p.Ser633Argfs *3	50	58	0	0	0	0	0	0	0	0	1	1	0	0	0	0	1	1	0	0	0
43	2	c.1978C>T	p.Arg660Trp	59	67	1	1	0	0	1	0	0	0	0	1	0	0	1	1	1	1	1	1	2
44	2	c.1978C>T	p.Arg660Trp	45	52	0	1	0	0	0	0	0	1	0	1	0	0	0	1	0	0	0	1	0
45	1	c.1978C>T	p.Arg660Trp	75		1		0		1		0		1		1		1		1		1		2
46	1	c.1166G>A	p.Arg389His	70		0		0		1		0		1		0		1		1		1		1
47	1			46		0		0		1		1		1		1		1		1		1		2
48	1	c.1166G>A	p.Arg389His	69		0		0		1		1		1		1		1		1		1		1
49	1	c.411G>T	p.Trp137Cys	65		1		1		1		1		1		0		1		0		1		1
50	1	c.659T>C	p.Leu220Pro	32		0		0		0		0		0		0		0		0		0		0
51	1	c.446G>A	Ser149Asn	59		1		0		1		1		1		0		1		1		1		1
52	1	c.1846G>A	p.Ala616Thr	60		0		0		1		1		1		0		0		0		1		2
53	1	c.1846G>A	p.Ala616Thr	71		1		0		1		1		1		1		1		1		1		2
54	1	c.621del664bp	p.Val208Trpfs*35	78		1		1		1		0		1		1		1		1		1		2
55	1	c.1415_16delAG	p.Gln472fsX83	21		0		0		0		0		0		0		0		0		0		0
56	1	c.621_900+384del664	p.Val208Trpfs*35	74		0		0		0		1		1		0		1		1		1		2
57	1	c.1A>G	p.Met1Val	73		0		0		1		1		1		0		0		1		1		2
58	1	c.1A>G	p.Met1Val	33		0		0		0		0		0		0		0		0		0		0
59	1	c.892G>A	p.Gly298Ser	53		1		0		0		0		0		0		0		1		1		1
60	1	exon6-9del		42		0		0		0		0		0		0		0		0		0		0
61	1	c.832G>T	p.Glu278*	39		0		0		1		1		0		0		0		0		0		0
62	1	c.446G>A	p.Ser149Asn	36		1		0		1		1		1		0		0		0		1		1
63	1	c.621del664bp	p.Val208Trpfs*35	46		0		0		0		0		1		0		0		0		0		0
63	1	c.621del664bp	p.Val208Trpfs*35	46		0		0		0		0		1		0		0		0		0		0
64	1	c.1A>G	p.Met1Val	38		0		0		0		0		0		0		0		0		0		0
65	1	c.1849C>T	p.Arg617Cys	51		0		0		0		0		1		0		0		1		0		0
The presence of symptoms or signs is categorized in 1 ‘Yes’ and 0 ‘No’. The duration of neurological symptoms is categorized in 0 ‘ No myelopathy ’, 1 ‘ Neurological symptoms for ≤ 10 years ’ and 2 ‘ Neurological symptoms for > 10 years ’.
