# Supplementary material for: Disease progression in women with X-linked adrenoleukodystrophy is slow
Source: Orphanet J Rare Dis. 2019 Feb 7;14:30. doi: 10.1186/s13023-019-1008-6 (PMC6367840; doi:10.1186/s13023-019-1008-6)
Supplement: Supplementary file 2 — Individual clinical data: SF-36, EDSS and ALDS values. SF-36 values were compared with norm values for the Dutch population and corrected for gender and age. The SF-36 subdomain scores are expressed in Z scores, ranging from − 4 (lowest quality of life) to + 4 (highest quality of life). The SF-36 summary scores were linearly transformed to a range from 0 (lowest quality of life) to 100 (highest quality of life), with a mean of 50 and standard deviation of 10. The EDSS ranges from 0 (normal) to 10 (death). The ALDS scores are regression coefficients which were linearly transformed for interpretation, ranging from 10 (highest level of disability) to 89.47 (lowest level of disability). ALDS = AMC Linear Disability Scale; EDSS = Expanded Disability Status Scale; MCS = mental component summary; PCS = physical component summary; SF-36 = Short Form (36) Health Survey. (XLSX 21 kb) [file 13023_2019_1008_MOESM2_ESM.xlsx]

## Sheet: Blad1
Additional file 2. Individual clinical data: SF-36, EDSS and ALDS values.
Subject	SF-36: Physical functioning 1	SF-36: Physical functioning 2	SF-36: Role physical 1	SF-36: Role physical 2	SF-36: Bodily pain 1	SF-36: Bodily pain 2	SF-36: General health perceptions 1	SF-36: General health perceptions 2	SF-36: Vitality 1	SF-36: Vitality 2	SF-36: Social functioning 1	SF-36: Social functioning 2	SF-36: Role emtional 1	SF-36: Role emotional 2	SF-36: Mental health 1	SF-36: Mental health 2	SF-36: PCS 1	SF-36: PCS 2	SF-36: MCS 1	SF-36: MCS 2	EDSS 1	EDSS 2	ALDS 1	ALDS 2
1	-0.65	-2.46	-1.13	-1.13	-0.72	-1.12	-2.74	-2.44	-1.12	0.23	-1.4	-0.3	0.6	0.6	0.66	0.66	30.3	22.84	55.08	65.17	2.5	6.0	86.06	81.97
2	-1.54	-1.75	-1.76	-1.67	-1.44	-0.55	-0.26	-1.03	0.56	-0.13	0.21	-0.87	0.48	0.69	0.12	0.13	32.34	31.63	60.52	57.13	2.0	3.5	89.47	88.33
3	-0.97	-1.75	-2.55	0.17	-0.01	1.5	-1.27	-1.88	0.56	0.1	-0.33	-0.31	0.48	-0.99	-0.1	0.9	35.73	43.66	55.13	51.68	4.0	4.0	88.56	84.59
4	0.47	0.47	0.63	0.78	1.12	0.41	-0.01	-0.47	-1.2	-0.81	0.75	0.24	0.48	0.69	-1.79	-1.02	59.31	53.68	40.61	46.39	2.0	3.0	89.47	89.47
5	-3.26		-1.76		-0.53		-1.53		-0.2		-0.87		-0.6		-0.52		28.01		51.68		6.0		87.96
6	-2.26	-1.9	-1.74	-1.31	-0.72	-1.04	-1.55	-1.05	-1.39	-1.67	-2.5	-2.39	-1.3	-0.38	0.44	0.34	30.59	31.14	44.23	47.27	5.5	6.0	71.92	71.92
7	-0.15	0.76	0.52	0.63	-1.52	0.43	-2.11	1	-1.62	0.56	0.68	0.75	0.55	0.48	-0.27	1.17	36.87	56.16	54.69	57.27	0.0	1.5	89.47	89.47
8	0.76	1.03	0.63	0.78	1.12	1.5	1.15	-0.38	0.56	1.01	0.75	0.79	0.48	0.69	0.54	1.29	60.44	56.96	53.05	58.59	2.0	3.0	89.47	89.47
9	0.47	1.03	0.63	0.78	-0.57	-0.55	-0.52	0.04	-0.95	-0.58	-0.33	-0.31	0.48	-0.15	0.12	0.13	47.71	53.9	50.57	46.65	0.0	3.0	89.47	89.22
10	-1.86	-2.06	-1.13	-1.74	-1.88	-1.88	-1.13	-3.04	-1.39	-1.39	-0.3	0.25	0.6	0.6	1.54	1.32	24.08	16.67	64.44	66.81	5.5	5.5	83.12	77.82
11	0.35	-0.85	0.7	0.36	0.61	-1.04	-0.83	-0.44	1.58	0.27	0.8	0.78	0.6	0.54	-1.09	1.21	54.18	38.52	52.34	64.72	3.5	4.0	88.40	87.02
12	0.91		0.91		1.29		0.8		-0.46		0.33		0.54		-0.09		61.77		47.07		3.5		89.47
13	0.18	-0.08	0.63	0.17	-0.01	-0.55	-0.26	-1.24	-0.45	-0.13	-0.87	-0.31	0.48	-0.15	-1.58	0.33	52.72	43.85	42.22	52.02	3.5	2.5	89.47	89.47
14	0.75	-0.45	0.78	0.7	1.5	-0.72	0.9	-1.55	0.56	-0.85	0.24	-0.85	0.69	-0.35	0.52	0.22	60.8	42.09	52.36	49.31	3.5	4.0	89.47	89.47
15	1.16	1.26	0.7	0.91	0.45	1.29	1.85	1.96	0.5	1.24	0.8	0.78	0.6	0.54	0.66	1.43	61.27	64.72	53.89	56.74	3.5	3.5	89.47	89.47
16	0.65	0.76	0.52	0.63	-0.27	1.12	0.8	1.4	0.75	1.56	0.68	0.75	0.55	0.48	0.97	0.96	52.54	60.87	58.59	56.86	0.0	2.0	89.47	89.47
17	-3.69		-0.45		-0.96		-1.75		-0.81		-1.42		0.69		-1.02		24.03		55.27		6.0		84.52
18	0.76	0.75	0.63	0.78	1.12	-0.09	0.75	-0.6	0.81	-0.13	0.75	0.79	0.48	0.69	0.75	0.33	58.94	50.46	54.89	55.55	0.0	3.5	89.47	89.47
19	-2.57	-2.4	-0.25	-2.55	-3.11	-2.27	-1.82	-2.38	-1.33	-2.21	0.08	-1.94	0.55	0.48	-1.02	-1.15	21.3	18.2	58.5	48.98	2.0	3.0	89.47	88.68
20	-2.66	-2.06	-1.74	-1.74	-1.48	-1.48	-3.63	-3.33	-2.48	-1.94	-0.3	-2.5	-0.35	-2.25	0.44	-1.52	17.26	29.01	55.89	32.26	6.0	6.0	71.92	75.25
21	0.76		0.63		1.12		-0.01		0.06		0.75		0.48		-0.31		58.3		49.24		0.0		89.47
22	0.65		0.52		1.15		1.09		-1.03		0.68		0.55		-0.52		60.78		45.33		0.0		89.47
23	-2.4	-2.86	-0.17	-1.06	-0.53	-0.55	-1.02	0.26	-0.2	-0.36	-0.87	0.24	0.48	0.69	-0.1	-0.06	33.11	32.57	56.69	59.93	3.5	4.5	89.47	84.52
24	-2.26		-1.13		-1.12		-2.44		-0.31		-0.3		0.6		1.1		22.62		65.5		6.0		78.67
25	1.16	1.08	0.7	0.91	-0.32	1.29	1.55	1.06	0.5	1	0.8	0.78	0.6	-0.38	1.32	1.43	56.26	63.45	58.46	52.98	3.0	3.0	89.22	89.47
26	0.47	0.47	0.63	0.78	0.43	0.33	-0.77	0.04	0.31	0.1	0.21	0.79	0.48	0.69	0.75	1.1	50.19	51.44	55.78	58.77	3.5	3.5	89.47	89.47
27	-2.03	-1.65	-1.67	-1.13	-0.96	-0.28	-1.97	-2.74	-1.27	-1.39	-2.53	-1.95	-1.84	-0.35	-0.44	0.22	32.62	30.68	38.2	48.15	3.5	3.5	87.77	80.86
28	0.65		0.52		1.15		0.51		0.45		0.68		0.55		0.47		57.82		53.43		0.0		89.47
29	-1.77	-0.1	0.52	0.63	-0.92	-0.01	-2.23	-1.63	-0.44	-0.45	-0.53	-0.33	0.55	-1.68	0.97	-1.15	29.92	52.07	62.53	36.85	0.0	3.5	87.52	88.56
30	-0.45	-1.65	0.09	0.7	0.61	0.2	0.65	0.36	-0.31	-0.58	-0.3	-0.3	0.6	0.6	0.88	0.22	49.18	44.08	54.79	55.14	3.5	6.0	89.46	89.47
31	-0.08	-0.05	0.78	-0.52	0.83	-0.72	-0.38	-1.85	-1.5	-1.66	0.79	-0.3	0.69	0.6	0.52	0.22	50.03	37.64	53.52	52.57	3.5	4.0	89.47	89.47
32	1.03	1.03	0.78	0.78	1.5	-0.09	0.04	0.26	0.79	0.56	0.79	0.79	0.69	0.69	0.71	0.9	59.23	53.44	55.15	58.2	3.5	3.5	89.47	89.47
33	-0.65	-0.25	0.7	0.7	-0.28	-0.28	-0.83	0.36	-0.85	0.23	-0.3	0.25	-1.3	0.6	0.01	0.66	47.94	47.87	44.11	57.82	3.5	4.0	87.74	89.46
34	0.47	-0.08	0.63	0.78	1.12	1.5	0.24	0.04	1.06	1.01	0.75	0.79	0.48	0.69	0.96	0.71	55.91	54.63	57.47	58.16	3.5	4.0	89.47	89.47
35	0.76	0.91	0.7	0.91	0.61	1.29	0.95	1.56	-0.04	1	0.8	0.78	0.6	0.54	0.66	0.78	57.23	63.15	54.15	54.48	2.5	2.5	89.47	89.47
36	0.47		0.78		1.5		-0.04				0.79		0.69								2.5		89.47
37	-1.25	-0.08	-2.55	0.17	-1.44	-0.55	-2.64	-1.24	-2.46	-1.5	-1.41	-0.31	-2.77	0.69	0.12	0.71	31.09	40.39	35.89	54.86	2.5	2.5	81.83	89.47
38	-0.29		0.38		-0.55		0.39		0.66		0.28		0.95		0.95		44.85		62.28		6.0		84.53
39	0.25		0.47		0.25		0.34		-0.49		-0.69		0.62		-0.26		52.66		47.86		2.0		89.47
40	0.25	0.65	0.47	-2.55	0.25	-0.98	-0.56	-0.66	0.43	-0.44	-2.17	0.08	0.62	0.55	0.29	-0.27	49.04	40.57	49.58	51.05	2.0	0.0	89.22	89.47
41	0.47	1.03	0.63	0.78	1.12	1.5	1	1.32	0.31	1.7	0.75	0.79	0.48	0.69	0.96	1.29	57.85	62.44	55.18	58.53	2.0	2.0	89.47	89.47
42	1.03	0.96	0.78	0.7	1.5	1.25	1.11	0.65	0.56	1.04	0.79	0.8	0.69	0.6	0.71	0.88	62.36	59.69	53.71	56.08	1.0	3.5	89.47	89.47
43	0.96	0.55	0.7	0.91	0.61	1.29	1.25	0.56	1.04	1.73	0.8	0.78	0.6	0.54	0.01	0.99	60.72	58.56	52.83	58.69	2.5	4.0	89.47	89.47
44	0.18	0.19	0.63	0.78	1.12	0.41	-0.01	-0.17	0.56	0.1	0.21	-0.31	-0.6	-0.15	0.33	0.13	57.5	53.65	47.95	48.46	2.0	3.5	89.47	89.47
45	-1.38		-1.31		0.26		0.05		0.03		0.78		-1.3		-0.53		46.91		45.64		6.0		77.50
46																					6.0
47	-2.03		0.78		0.33		-1.24		0.1		0.24		0.69		0.13		38.68		59.99		3.5		89.47
48	-0.5		-1.31		-1.04		0.56		0.51		0.33		0.54		0.99		39.89		61.17		3.5		85.57
49	0.55		0.7		0.61		1.43		0.5		0.8		0.6		1.1		57.24		57.29		2.5		89.47
50	0.25		0.52		-0.98		-0.95		-0.14		-0.53		0.55		0.22		43.67		54.23		2.0		89.47
51	-2.06		-1.13		-0.72		-0.83		-1.12		-0.85		-2.25		-0.87		40.18		37.38		6.0		80.60
52	-1.05		-1.74		-1.12		-0.65		-1.66		0.8		0.6		0.22		33.04		56.91		3.5		88.63
53	-1.2		-1.31		-1.04		-0.44		-1.67		-0.58		0.54		-0.74		36.01		49.08		4.5		81.74
54	-0.98		1.63		0.59		0.66		1.09		1.09		0.95		1.33		49.37		66.3		6.0		74.06
55	0.71		0.47		0.25		0.52		-0.19		0.05		-0.37		-0.82		58.94		41.84		0.0		89.47
56	-0.32		-0.76		-0.6		-0.79		-0.21		-1.03		-1.3		-0.74		46.7		39.87		2.5		89.47
57	0.73		0.36		-0.21		-0.44		0.76		-0.13		0.54		-0.31		51.28		51.74		3.5		89.09
58	0.65		0.52		1.15		1.09		1.34		0.68		0.55		0.97		59.05		57.03		0.0		89.47
59	0.75		-0.45		-0.55		0.04		0.1		0.24		0.69		0.52		47.67		55.59		2.5		89.47
60	0.76		0.63		-0.53		-0.26		0.56		0.75		0.48		0.75		49.54		58.24		1.0		89.47
61	-1.54		-2.55		-0.1		-1.63		-2.21		-3.02		0.48		0.54		28.94		47.38		2.0		89.47
62	-0.68		-0.96		-0.53		-2.13		-2.21		-1.41		0.48		-0.52		35.14		46.13		3.0		88.56
63	1.03		0.78		0.33		0.68		-0.81		-0.87		-0.15		-0.63		60.38		39.26		2.0		89.47
64	0.76		0.63		1.12		0.75		-0.2		0.75		0.48		0.54		58.88		51.79		1.0		89.47
65	-0.36		0.78		0.41		0.47		0.1		0.79		0.69		0.9		49.87		59.28		2.5		89.47
SF-36 values were compared with norm values for the Dutch population and corrected for gender and age. The SF-36 subdomain scores are expressed in Z scores, ranging from -4 (lowest quality of life) to +4 (highest quality of life). The SF-36 summary scores were linearly transformed to a range from 0 (lowest quality of life) to 100 (highest quality of life), with a mean of 50 and standard deviation…
